# Supplementary material for: The design of fluorescein–ferrocene derivatives as HOCl-triggered turn-on fluorescent probes and anticancer prodrugs
Source: Royal Society of Chemistry journal article supplement (doi:10.1039/d2dt02198f), 2022-01-01
Supplement: d2dt02198f1.pdf [file d2dt02198f1.pdf]

## Supporting Information

### **Design of Fluorescein-Ferrocene Derivatives as HOCl -triggered Turn-on Fluorescent Probe and Anticancer Prodrug**

Rui-qi Wang<sup>a</sup>, Tong Zhou<sup>a</sup>, Aimin Li<sup>b</sup>, Jian Qu<sup>c,\*</sup>, Xin Zhang<sup>c</sup>, Xiang-feng Zhu<sup>a</sup>, Su  
Jing<sup>a,\*</sup>

<sup>a</sup> School of Chemistry and Molecular Engineering, Nanjing Tech University, Nanjing  
211816, China. E-mail: sjing@njtech.edu.cn

<sup>b</sup> State Key Laboratory of Pollution Control and Resource Reuse, School of the  
Environment, Nanjing University, Nanjing 210023, China.

<sup>c</sup> School of Materials Science and Engineering, Yancheng Institute of Technology,  
Yancheng 224051, China, E-mail: iamqujian@ycit.edu.cn

## Synthesis of precursor 1

The precursors of fluorescein derivative 1 were obtained referring to the previous reports.<sup>1,2</sup> Scheme S1 illustrates the synthetic route of precursors 1. The details of synthesis are as follows.

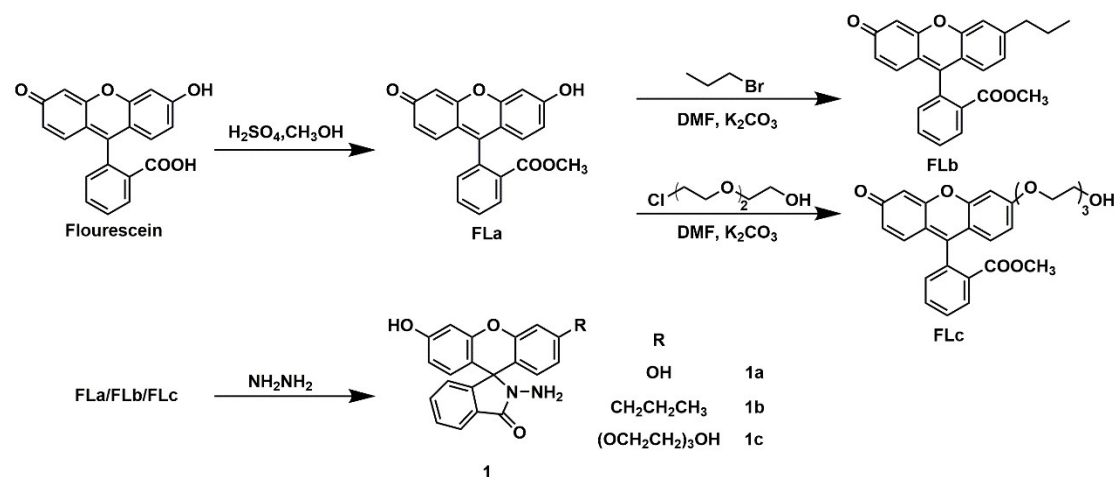

**Scheme S1.** Synthetic route of precursors 1.

**Compound FLa** Typically, fluorescein (3.32 g, 0.01 mol) was dissolved in 100 mL of methanol and concentrated sulfuric acid (1.0 mL) was added dropwise to the solution and refluxed for 8 h. After cooling, excess methanol was removed under reduced pressure and excess water was added to the residue. The red solid **1a** was washed with water several times and dried in vacuum, obtained in 91% yield.

**Compound FLb** Bromopropane (0.25 g, 2.0 mmol) or 2-[2-(2-chloroethoxy)ethoxy]ethanol (0.34 g, 2.0 mmol), K<sub>2</sub>CO<sub>3</sub> (0.27 g, 2.0 mmol) and **compound 1a** (0.35 g, 1.0 mmol) were added into 15 mL DMF and stirred at 120 °C for 12 h. Then the solvent was removed under reduced pressure and the product was purified through a silica gel column eluted with AcOEt/ CH<sub>3</sub>OH (v/v = 30:1) or AcOEt/ CH<sub>3</sub>OH (v/v = 20:1), obtained in 88% yield.

**Compound FLc** 2-[2-(2-Chloroethoxy)ethoxy]ethanol (0.34 g, 2.0 mmol), K<sub>2</sub>CO<sub>3</sub> (0.27 g, 2.0 mmol) and **compound 1a** (0.35 g, 1.0 mmol) were added into 15 mL DMF and stirred at 120 °C for 12 h. Then the solvent was removed under reduced pressure and the product was purified through a silica gel column eluted with AcOEt/ CH<sub>3</sub>OH

( $v/v = 30:1$ ) or AcOEt/ CH<sub>3</sub>OH ( $v/v = 20:1$ ), obtained in 85% yield.

**Compound 1** Compound **FLa/FLb/FLc** (0.40 g) and hydrazine hydrate (0.24 g, 4.8 mmol) were added to 5.0 mL methanol, refluxed and stirred for 6 h. The solvent was removed under reduced pressure and the product was washed three times with water. The solid was obtained in 89% (**1a**), 84% (**1b**) and 80% (**1c**) yield accordingly.

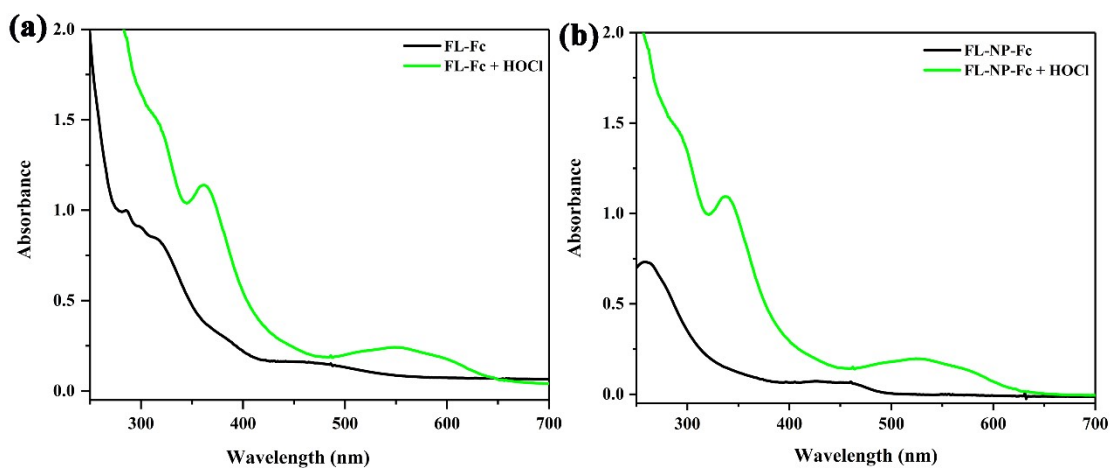

**Figure S1.** UV-vis absorption spectra of (a) **FL-NP-Fc** with or without HOCl in DMSO/PBS buffer solution (1/10,  $v/v$ , 5.0  $\mu$ M, pH = 7.4) and (b) **FL-Fc** with or without HOCl in DMSO/PBS buffer solution (1/10,  $v/v$ , 5.0  $\mu$ M, pH = 7.4)

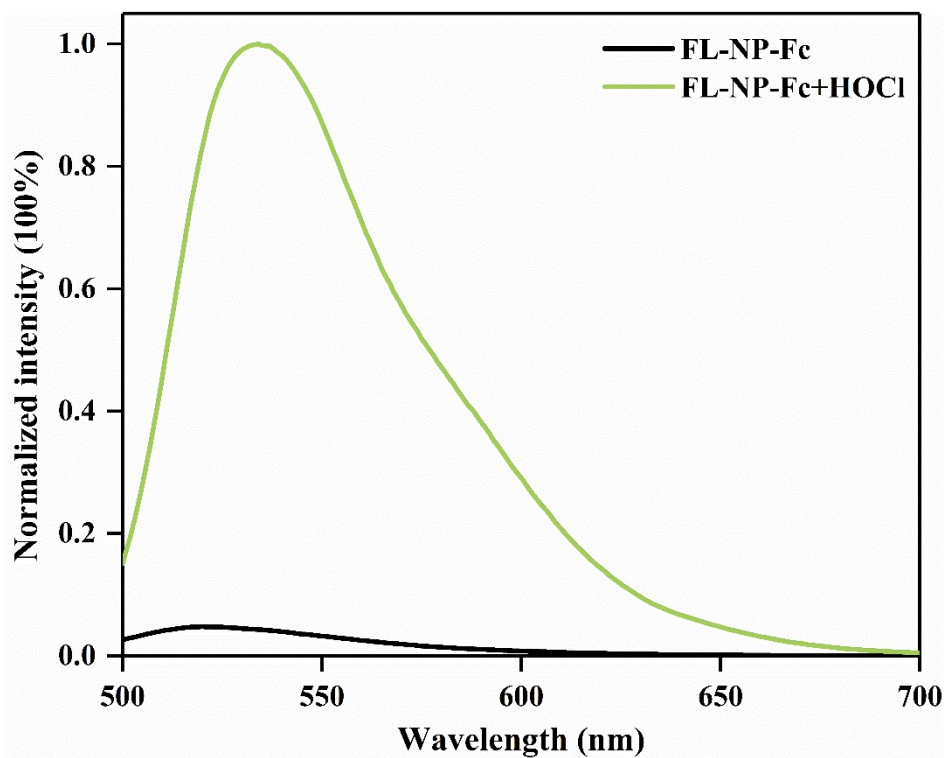

**Figure S2.** Fluorescence emission spectra of FL-NP-Fc with or without HOCl in DMSO/PBS buffer solution (1/10, v/v, 5.0  $\mu$ M, pH = 7.4) ( $\lambda_{\text{ex}}$  = 488 nm).

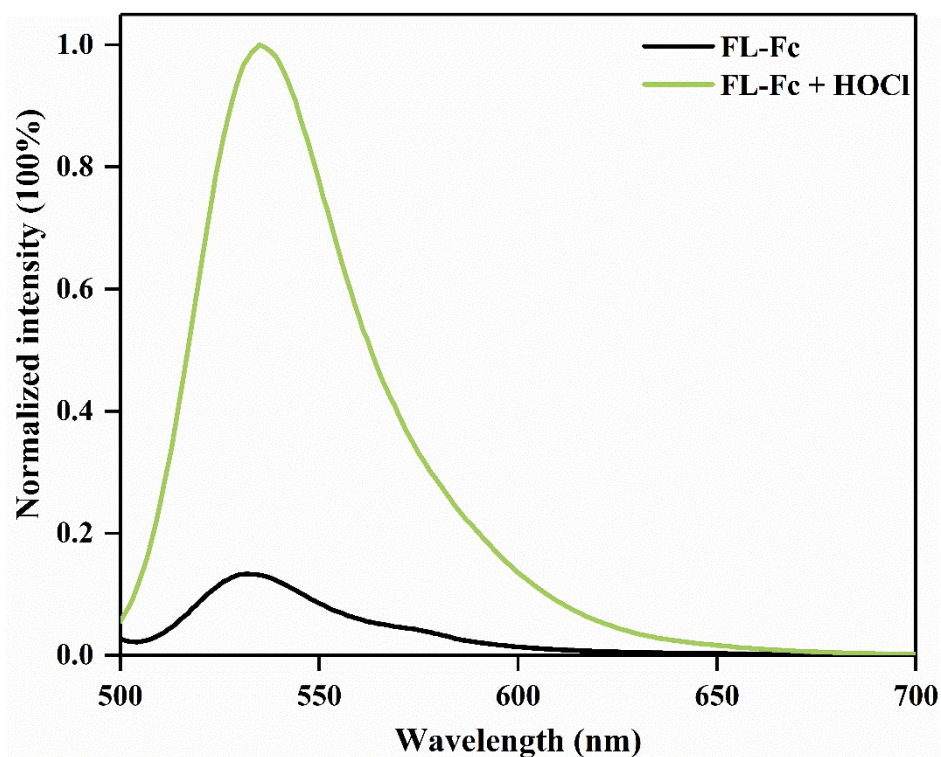

**Figure S3.** Fluorescence emission spectra of FL-Fc with or without HOCl in

DMSO/PBS buffer solution (1/10, v/v, 5.0  $\mu$ M, pH = 7.4) ( $\lambda_{\text{ex}}$  = 488 nm).

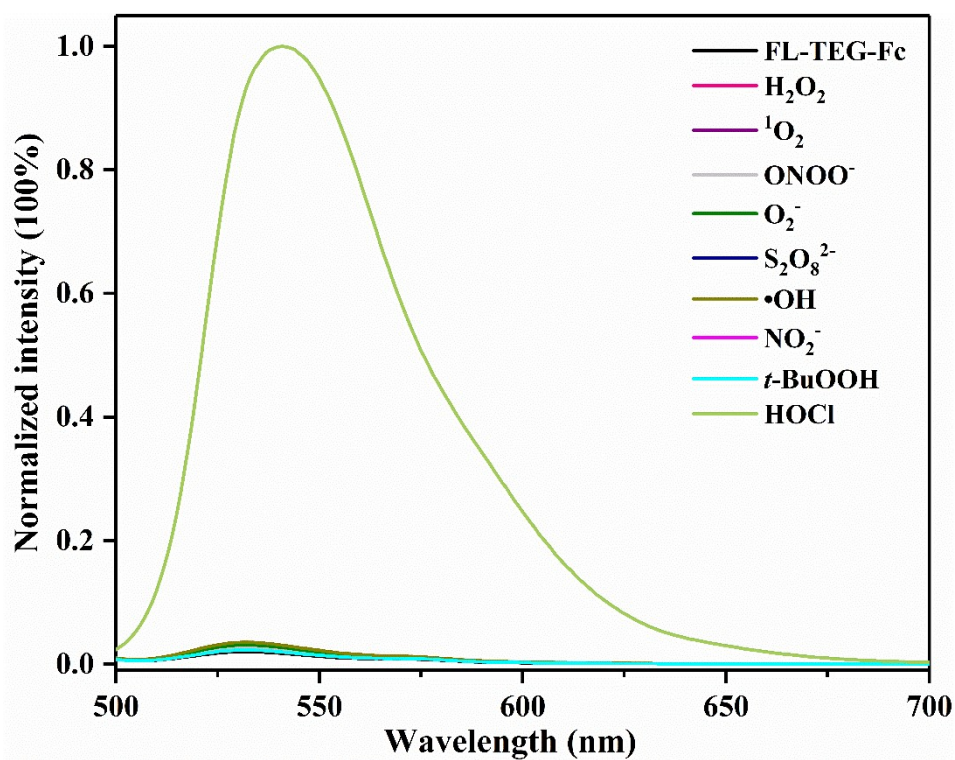

**Figure S4.** Fluorescence emission changes of **FL-TEG-Fc** against ROS/RNS in DMSO/PBS buffer solution (1/100, v/v, 0.25 mM, pH = 7.4) ( $\lambda_{\text{ex}}$  = 488 nm).

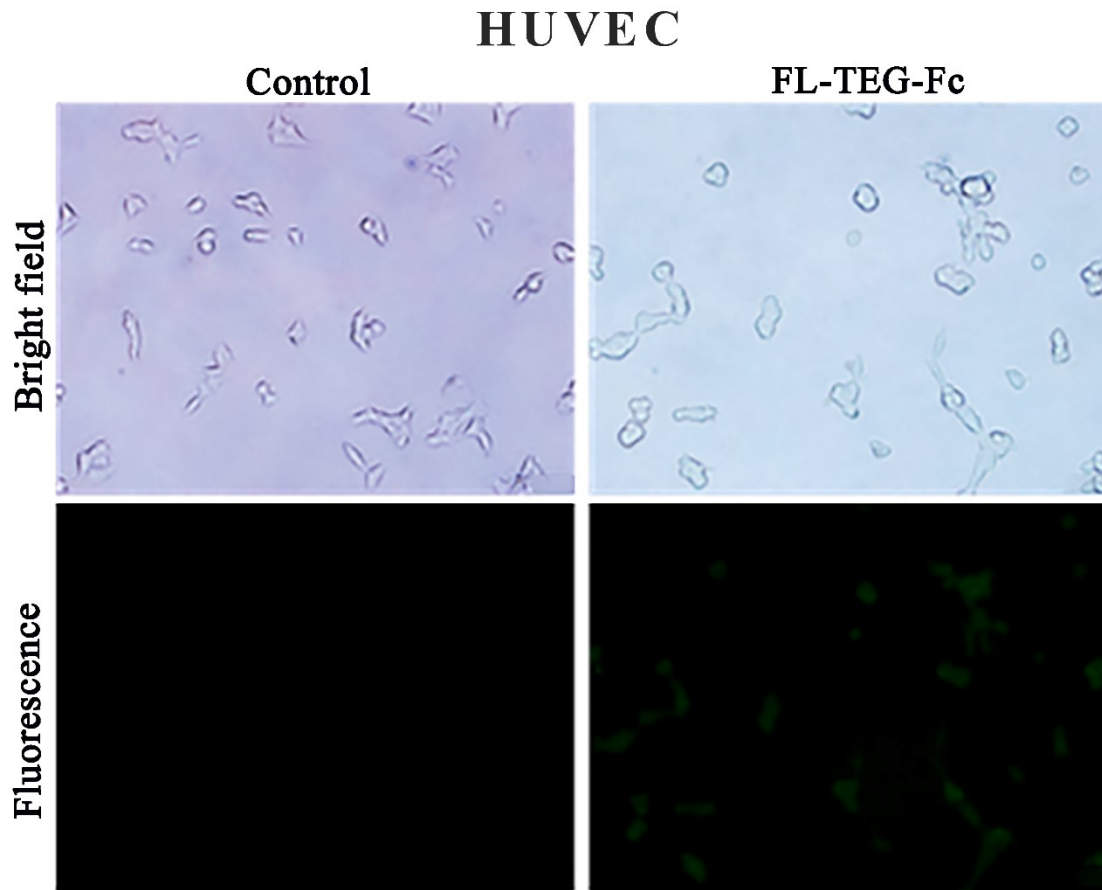

**Figure S5.** Fluorescence images of HUVEC cells treated with 100  $\mu$ M of FL-TEG-Fc in DMEM for 1 h. Images were obtained by fluorescence microscopy.

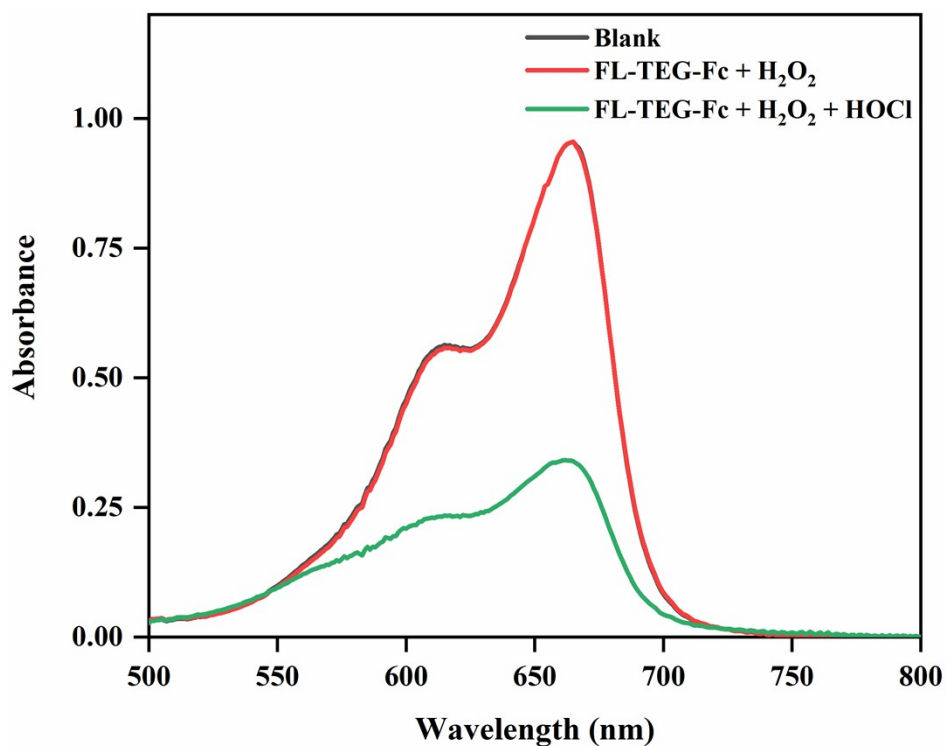

Figure S6. UV-vis spectra of MB treated by different reagents.

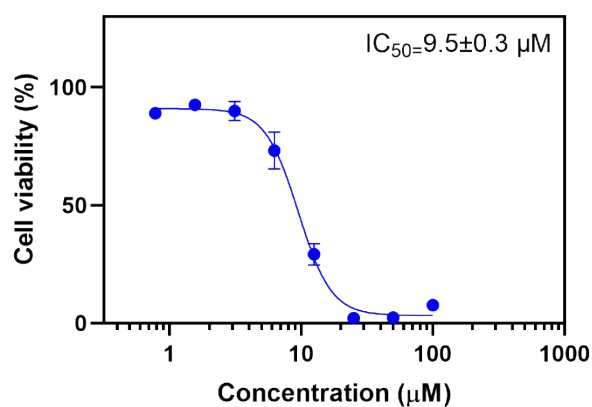

Figure S7. Anticancer activities of FL-TEG-Fc in AGS cells.

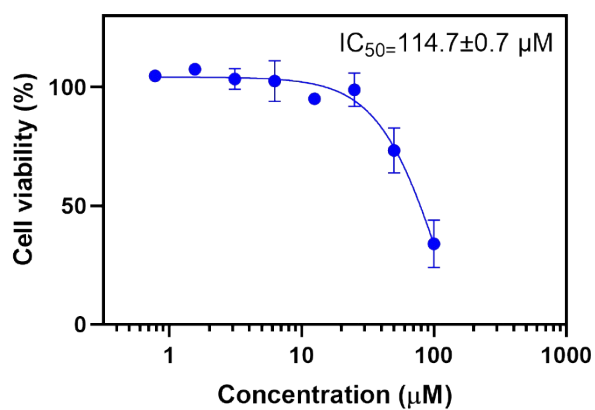

Figure S8. Anticancer activities of FL-TEG-Fc in HUVEC cells.

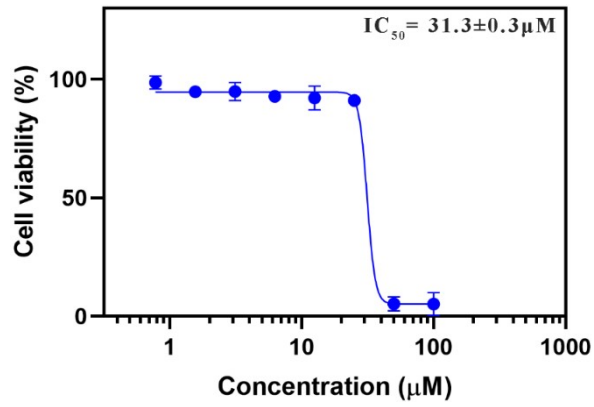

**Figure S9.** Anticancer activities of **FL-NP-Fc** in AGS cells.

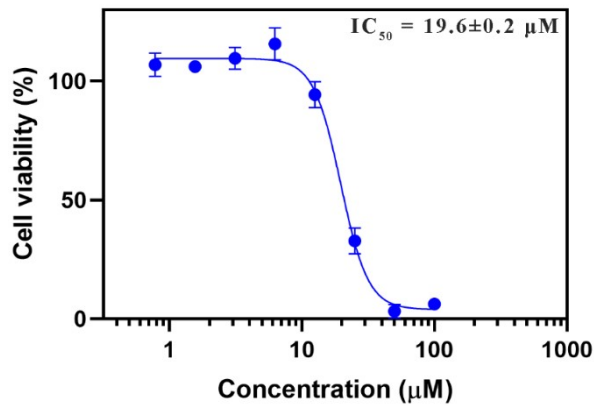

**Figure S10.** Anticancer activities of **FL-Fc** in AGS cells.



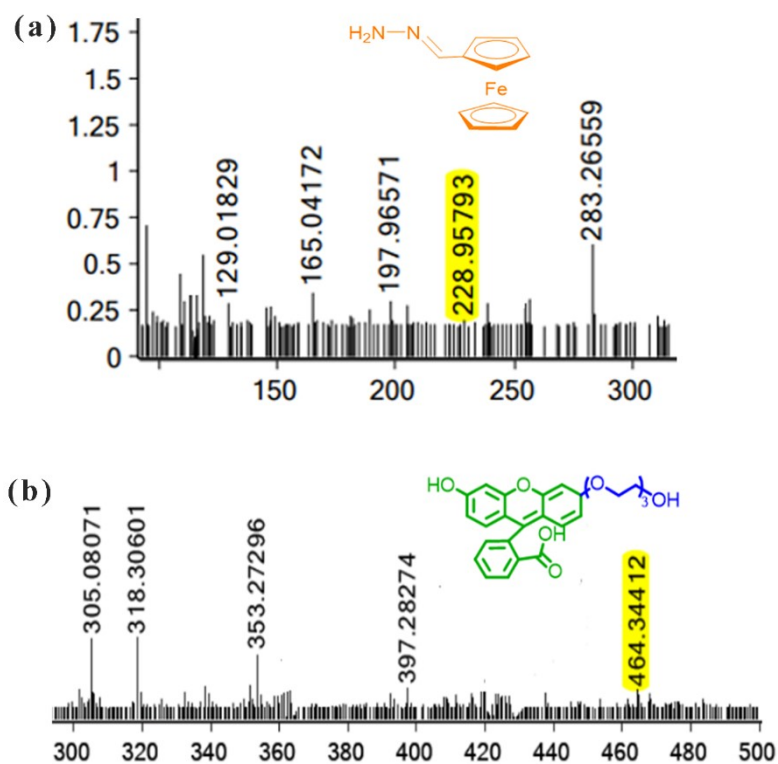

**Figure S11.** Mass spectrometry spectra of dissociative products of FL-TEG-Fc with HOCl.

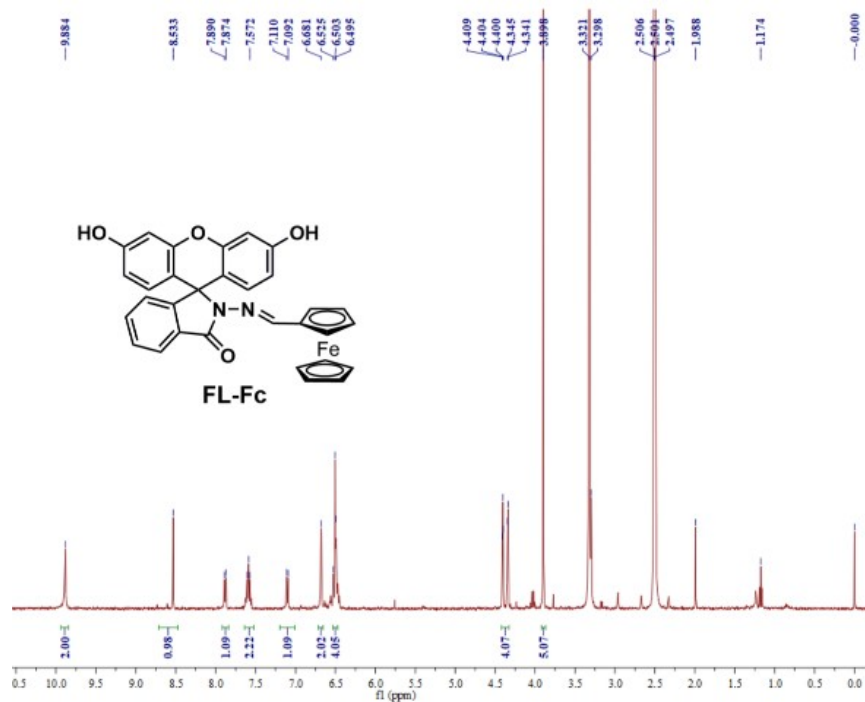

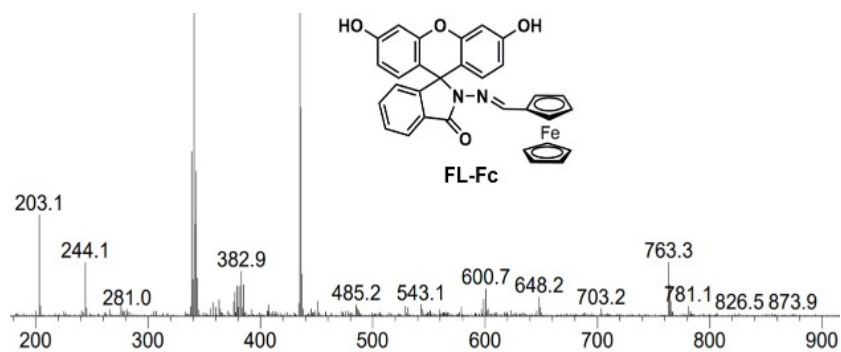

Figure S12. <sup>1</sup>H NMR and HRMS spectra for compound FL-Fc.

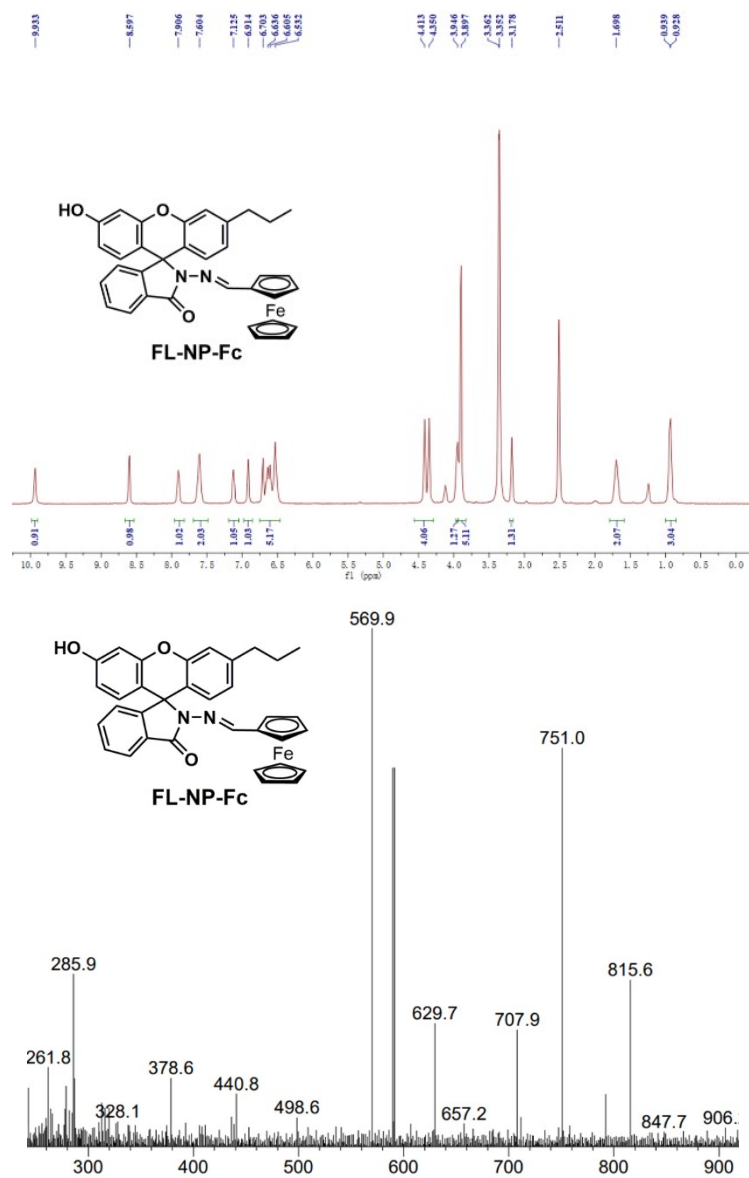

Figure S13. <sup>1</sup>H NMR and MS spectra for compound FL-NP-Fc.

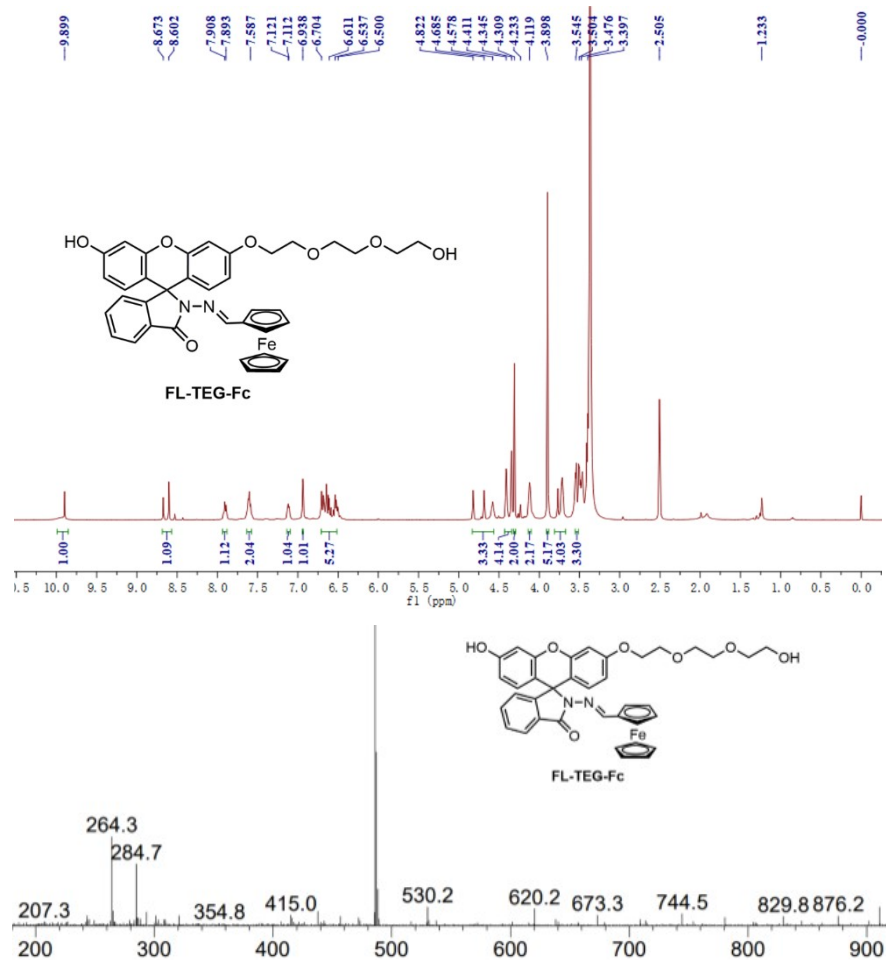

**Figure S14.** <sup>1</sup>H NMR and MS spectra for compound **FL-TEG-Fc**.

**Table S1** Comparison of FL-TEG-Fc with other representative HOCl probes.

| Entry | Probes                                                                                                                                | $\lambda_{\text{ex}}/\lambda_{\text{em}}$<br>(nm) | Response<br>Time | Detection Limit<br>( $\mu\text{M}$ ) | Applications                            | Reference |
|-------|---------------------------------------------------------------------------------------------------------------------------------------|---------------------------------------------------|------------------|--------------------------------------|-----------------------------------------|-----------|
| 1     | 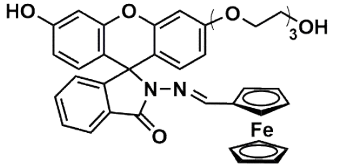 <p style="text-align: center;"><b>FL-TEG-Fc</b></p> | 488/523                                           | 60 s             | 6.5                                  | Sensing, imaging and anticancer prodrug | This work |
| 2     |                                                      | 488/520                                           | 2 min            | -                                    | Sensing and imaging                     | [1]       |
| 3     |                                                     | 620/686                                           | 3 min            | --                                   | Sensing, imaging and anticancer prodrug | [3]       |

|   |  |         |       |       |                     |     |
|---|--|---------|-------|-------|---------------------|-----|
| 4 |  | 585/730 | 7 s   | 0.11  | Sensing and imaging | [4] |
| 5 |  | 450/520 | 40 s  | 0.04  | Sensing and imaging | [5] |
| 6 |  | 410/490 | 400 s | 2.16  | Sensing and imaging | [6] |
| 7 |  | 556/627 | 5 s   | 0.007 | Sensing and imaging | [7] |
| 8 |  | 383/520 | 80 s  | 0.012 | Sensing and imaging | [8] |

|    |                                                                                     |         |       |       |                                         |      |
|----|-------------------------------------------------------------------------------------|---------|-------|-------|-----------------------------------------|------|
| 9  | 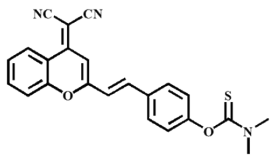   | 545/685 | 5 min | 0.164 | Sensing and imaging                     | [9]  |
| 10 |    | 620/686 | 60 s  | --    | Sensing, imaging and anticancer prodrug | [10] |
| 11 |    | 365/509 | 150 s | 0.12  | Sensing and imaging                     | [11] |
| 12 |  | 685/725 | 5 s   | 0.131 | Sensing and imaging                     | [12] |

|    |                                                                                   |         |       |      |                     |      |
|----|-----------------------------------------------------------------------------------|---------|-------|------|---------------------|------|
| 13 | 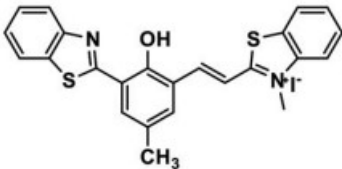 | 450/552 | 5 min | 0.13 | Sensing and imaging | [13] |
|----|-----------------------------------------------------------------------------------|---------|-------|------|---------------------|------|

**Table S2.** Cytotoxicities of ferrocene-fluorescein derivatives and fluorescein precursors in AGS and HUVEC cells for 72 h.

| Compounds        | IC <sub>50</sub> (μM) |       |
|------------------|-----------------------|-------|
|                  | AGS                   | HUVEC |
| <b>FL</b>        | >100                  | >100  |
| <b>FL-Fc</b>     | 19.6 ± 0.2            | >100  |
| <b>FL-NP</b>     | >100                  | >100  |
| <b>FL-NP-Fc</b>  | 31.3 ± 0.3            | >100  |
| <b>FL-TEG</b>    | >100                  | >100  |
| <b>FL-TEG-Fc</b> | 9.5 ± 0.3             | >100  |



## REFERENCES

- [1] R. Zhang, J. Zhao, G. Han, Z. Liu, C. Liu, C. Zhang, B. Liu, C. Jiang, R. Liu, T. Zhao, M.-Y. Han and Z. Zhang, *J. Am. Chem. Soc.*, 2016, **138**, 3769-3778.
- [2] W. Yin, H. Zhu and R. Wang, *Dyes Pigm.*, 2014, **107**, 127-132.
- [3] L. Liu, F. Liu, D. Liu, W. Yuan, M. Zhang, P. Wei and T. Yi, *Angew. Chem., Int. Ed.* 2022, **61**, e202116807.
- [4] M. He, M. Ye, B. Li, T. Wu, C. Lu, P. Liu, H. Li, X. Zhou, Y. Wang, T. Liang, H. Li and C. Li, *Sens. Actuators B: Chem.*, 2022, **364**, 131868.
- [5] T. Huang, S. Yan, Y. Yu, Y. Xue, Y. Yu and C. Han, *Anal. Chem.*, 2022, **94**, 1415-1424.
- [6] X. Yang, J. Liu, P. Xie, X. Han, D. Zhang, Y. Ye and Y. Zhao, *Sens. Actuators B: Chem.*, 2021, **347**, 130620.
- [7] X. Bao, X. Cao, Y. Yuan, B. Zhou and C. Huo, *Sens. Actuators B: Chem.*, 2021, **344**, 130210.
- [8] B. Wang, F. Yuan, S. Wang, R. Duan, W.-X. Ren and J.-T. Hou, *Sens. Actuators B: Chem.*, 2021, **348**, 130695.
- [9] J. Liu and Z. Yin, *Talanta*, 2019, **196**, 352-356.
- [10] P. Wei, L. Liu, Y. Wen, G. Zhao, F. Xue, W. Yuan, R. Li, Y. Zhong, M. Zhang and T. Yi, *Angew. Chem., Int. Ed.*, 2019, **58**, 4547-4551.
- [11] Q. Xia, X. Wang, Y. Liu, Z. Shen, Z. Ge, H. Huang, X. Li and Y. Wang, *Spectrochim. Acta. A Mol. Biomol. Spectrosc.*, 2020, **229**, 117992.
- [12] W. Gao, Y. Ma, Y. Liu, S. Ma and W. Lin, *Sens. Actuators B: Chem.*, 2021, **327**, 128884.
- [13] Y. Huang, Y. Zhang, F. Huo, Y. Liu and C. Yin, *Dyes Pigm.*, 2020, **179**, 108387.
